1 **A Systems Change Framework for Evaluating Academic Equity and Inclusion in an**  
2 **Ecology & Evolution Graduate Program**

3  
4 **Kelly J Wallace\* & Julia M York\***

5 *\*both authors contributed equally*

6 Kelly J Wallace ORCID: 0000-0002-2361-1213

7 Julia M York ORCID: 0000-0003-4947-0591

8 Authors for correspondence: Kelly J. Wallace & Julia M York

9 [kwallace@utexas.edu](mailto:kwallace@utexas.edu), [juliayork@utexas.edu](mailto:juliayork@utexas.edu)

10 University of Texas at Austin, Department of Integrative Biology

11 1 University Station C0990

12 Austin, Texas 78712

13

14 **Abstract**

15 While academia is moving forward in terms of diversifying recruitment of undergraduate and  
16 graduate students, diverse representation is still not found across the academic hierarchy. At  
17 the graduate level, new discussions are emerging around efforts to improve the experiences of  
18 women and underrepresented minorities through inclusive graduate programming. Inclusive  
19 graduate programs are that which actively center and prioritize support for diverse experiences,  
20 identities, career goals, and perspectives, from recruitment through graduation. Establishing  
21 regular and rigorous evaluation of equity and inclusion efforts and needs is a critical component  
22 of this work. This is recognized by funding agencies that increasingly require reporting on  
23 inclusion efforts; here we suggest use of a systems change framework for these evaluations.

24

25 A systems change approach emphasizes three levels: explicit change (e.g. policies), semi-  
26 explicit change (e.g. power dynamics), and implicit change (e.g. biases). We use the Ecology,  
27 Evolution, and Behavior (EEB) PhD Program at the University of Texas at Austin in an exercise  
28 to (1) identify areas of concern regarding inclusive programming voiced by graduate students,  
29 (2) categorize efforts to address these concerns, and (3) integrating and evaluating which areas  
30 of the systems change framework show the greatest progress or potential for progress. We  
31 argue this framework is particularly useful for academic systems as they are complex,  
32 composed of variable individuals, and must address diverse stakeholder needs.

33

34 **Keywords**

35 systems change, graduate students, evaluation, diversity, inclusion, climate

36

### 37 **General Background**

38 Since 2008, women have earned 60% of baccalaureate degrees and the majority of doctoral  
39 degrees in biology in the U.S., and in 2016, 42% of baccalaureate degrees and 32% of  
40 doctorates in biology were earned by underrepresented minorities (NSF, 2019). Thus, the  
41 elementary demographics of biology doctorate earners is roughly representative of the U.S.  
42 population as a whole, which was 51% women and 36% non-white in 2017 (although much  
43 intersectional work remains beyond these most crude categorizations; Patridge et al., 2014; Van  
44 Cooten, 2014; Li and Koedel, 2017; Reardon, 2017; Brown and Leigh, 2018; NSF, 2019; Barnes  
45 et al., 2020). This representation, however, is dramatically reduced at the faculty level: only 35%  
46 of biology faculty are women and 25% are people of color (among full professors 15% are  
47 people of color; NSF, 2019). If faculty demographics were representative of the available PhD  
48 applicant pool, we are living in 1987 (the most recent year when women accounted for 35% of  
49 biology doctorate earners; NSF, 2017). So why is biology academia more than 30 years  
50 behind?

51

52 We suggest that experiences in graduate school are a determining factor of the leaky pipeline.  
53 During graduate school, most PhD students first experience and internalize the academic  
54 lifestyle, and the majority choose another career path (Joseph, 2012; Mack et al., 2013). While a  
55 successful PhD program prepares students for the myriad careers doctorate holders in biology  
56 eventually pursue (Turk-Bicakci et al., 2014), those leaving academia are disproportionately  
57 women (Martinez et al., 2007; Shaw and Stanton, 2012; Glass et al., 2013) and  
58 underrepresented minorities (Allen-Ramdial & Campbell, 2014; Li and Koedel, 2017; **Figure**  
59 **1A**); this must change. There is not one single reason why women and underrepresented  
60 minorities leave academia. Rather, it is a comprehensive and nuanced set of experiences  
61 wherein marginalized students use the acumen and perception that gained them acceptance  
62 into their doctoral program to learn the many ways in which the academic system is not built for  
63 them (Ong et al., 2011; Puritty et al., 2017; Slay et al., 2019; Makarem and Wang, 2020). This is  
64 a product not only of their own experiences, but in also the keenly observed experiences of co-  
65 workers and representative faculty (Settles et al., 2006; Case and Richley, 2013; Hirshfield,  
66 2014; Patridge et al., 2014; San Miguel and Kim, 2015; Yoder and Mattheis, 2015).

67

68 Many graduate programs in biology have implemented spaces, techniques, conversations, and  
69 policies to improve graduate student well-being, particularly for under-represented students  
70 (Bekki et al., 2013; Porter et al., 2018; Williams and Korn, 2018; Gold et al., 2020). Even as  
71 these individual efforts are successful, however, the inequities they attempt to counter persist.  
72 Why? We posit that reliance on unimodal or sporadic diversity efforts is insufficient for  
73 fundamental change. Instead, programmatic diversity efforts must be orchestrated to sustain  
74 systemic change. We propose using a *systems change framework* to critically evaluate,  
75 develop, and coordinate equity and inclusion efforts across system modes (Coffman, 2007). A  
76 systems change framework (described in more detail below) is not a new concept, but here we  
77 argue that it is a particularly useful framework for biology graduate programs to critically  
78 evaluate the cross-hierarchical, systemic challenges and reform efforts that graduate programs  
79 face and implement, respectively, particularly as it relates to mentorship, diversity, and  
80 inclusion.

81  
82 Here we detail an exercise for graduate programs to evaluate and strategize their inclusivity  
83 efforts. In undertaking the exercise for our graduate program as an example, we demonstrate  
84 the value of a systems change framework in identifying the areas of progress and areas of need  
85 in a graduate program. Using a systems change framework, we categorize the most common  
86 gaps in support for graduate students, allowing us to “see the water” of the system, and then we  
87 categorize recent programmatic efforts to address those concerns (Kania et al., 2018). We use  
88 this paired framework to illuminate areas of progress and areas in need of increased focus for  
89 future program development.

90  
91 As biology PhD candidates ourselves, we lack direct power to enact changes that would reform  
92 the system on an institutional level. Availability of mental health resources, handling of  
93 harassment and misconduct cases, selection of administration, and family leave policies are all  
94 in dire need of systemic reform by those with administrative power (Anders, 2004; Handelsman  
95 et al., 2005; Case and Richley, 2013; Su et al., 2015). In addition to advocating for these  
96 institutional reforms, we believe we can counteract negative graduate student experiences by  
97 focusing on departmental culture and climate reform, utilizing thoughtful and inclusive data  
98 collection on the quality of the graduate student experience followed by implementation of  
99 actions based on those data (Institute of Medicine, 2007; Tao and Gloria, 2019, Slay et al.,  
100 2019). We include more information on our individual inclusivity efforts in the supplemental  
101 materials for those interested, but our goal here is not to summarize or elaborate on those

102 efforts, it is rather to engage in an exercise where we critically evaluate them in the context of  
103 the systemic issues they were implemented to address.

104

### 105 **What is a Systems Change Framework?**

106 The theory of *systems change* is designed to reform the underlying conditions in a system as  
107 they relate to social change, diversity, and inclusion, and was originally conceived in activist  
108 pedagogy (Coffman, 2007). Its early applications centered around access to resources related  
109 to physical and mental health in early childhood development, and recently has become more  
110 frequently utilized in corporate management areas and social organizations (Kania et al., 2018;  
111 Seelos and Mair, 2018). The systems change framework is a construct intended to organize and  
112 evaluate the needs and corresponding efforts of a community, especially when that community  
113 is composed of diverse stakeholders. It allows the community system to become the focus of  
114 inquiry, rather than individual victims or perpetrators (Foster-Fishman and Watson, 2018). This  
115 makes it particularly useful for academic systems where stable conditions result from variable  
116 and dynamic individuals and individual actions (Jenal and Cunningham, 2020).

117

118 The systems change framework itself is a descriptive set of interconnected spheres or  
119 categories of influence of a “system” - for example, a program, department, school, business,  
120 organization, or initiative. Systems operate on many organizational levels (e.g. individual,  
121 community, state), often have a variety of funding sources, and must “tackle difficult deep-  
122 rooted problems such as gaps in services and outcomes based on race, income, culture, and  
123 language” (Coffman, 2007). The framework allows these complexities to be dissected and  
124 evaluated without losing sight of the system as a whole (Foster-Fishman and Watson, 2018).  
125 Systems frameworks do this by emphasizing understanding the system and tailoring  
126 interventions, rather than focusing on success or failure of individual efforts (Seelos and Mair,  
127 2018). Given this, we believe the framework provides a clear format to help graduate programs  
128 evaluate and tackle such deep-rooted and complex problems as persist in academia.

129

130 The literature on systems change varies in nomenclature and the number of categories, here we  
131 choose to utilize the framework described in Kania, Kramer, and Senge (2018) “The Water of  
132 Systems Change.” Kania et al. highlight six “conditions” or areas of systems change that fall into  
133 three categories: explicit, semi-explicit, and implicit. We adjust the definitions to the six  
134 conditions used by Kania et al in terms of specificity to graduate programs (**Figure 2**).

135

## 136 **Exercise General Description**

137 We designed an exercise that consists of three primary parts:

138

139 *Step 1: Data collection/system assessment: Regularly assess the most common concerns or*  
140 *needs expressed by all stakeholders in the program*

141 *Step 2: Identify currently existing or proposed efforts developed to address those*  
142 *concerns/needs. Organize those efforts into the categories of the systems change framework*

143 *Step 3: Evaluate the areas of overlap and limitations from Steps 1 and 2. Identify which*  
144 *categories of the systems change framework show the greatest progress in tackling concerns,*  
145 *and conversely which categories show the most urgent need for additional attention*

146

147 In the following sections we apply this to our graduate program: the Ecology, Evolution, and  
148 Behavior (EEB) Graduate Program at the University of Texas at Austin, as an example. We  
149 believe this program is an effective example because we are addressing challenges present in  
150 other programs and our demographics are roughly similar to national averages (Princeton  
151 Graduate Women in STEM Leadership Council, 2018; Slay et al., 2019; NSF, 2019). Current  
152 graduate students are 52% female while supervising faculty are 34% female (22% of the senior  
153 faculty). This disparity in representation is reflected across several pools of data: for example,  
154 comparing the gender of the admitted graduate students with that of the faculty applicant pool  
155 **(Figure 1B, 1C)**. Data regarding racial and ethnic composition is more difficult to obtain due to  
156 small sample sizes, as well as being more difficult to disseminate while protecting anonymity,  
157 yet show that admitted students from minority groups underrepresented in science (Black,  
158 Hispanic, and Native American) show lower PhD graduation rates **(Figure 1A)**. We recognize  
159 that the information we present here still does not fully encompass all the unique and  
160 intersectional challenges that many other underrepresented groups face (e.g. sexuality,  
161 disability status, socioeconomic status) and see this as a strong avenue for additional work.

162

### 163 **Step 1: Identifying and categorizing areas of concern through data collection**

164 We collected a list of common concerns expressed by graduate students in the program. This  
165 list was primarily comprised of responses to a comprehensive climate survey developed in 2018  
166 and administered for the department by one of the authors (supplemental material 2) and was  
167 supplemented by the first-hand experiences of the authors and conversations regarding  
168 experiences of other students. We acknowledge this list is not exhaustive and may be limited  
169 based on our own mental models and personal relationships, however we believe the practice

170 of compiling this list builds capacity to understand and “see” the program as a system. In  
171 describing the items on the list, we took great care to keep information as anonymous as  
172 possible. We then sorted these concerns into the categories of the systems change framework  
173 (explicit, semi-explicit, implicit) as well as specific-sub-categories (**Figure 3**).

174

### 175 **Step 2. Identifying Efforts**

176 Students in the UT Austin EEB Graduate Program have spent significant time and energy  
177 developing and implementing reforms to address many of the concerns described in Step 1. We  
178 listed these efforts, categorizing them into the systems change framework (**Figure 4**). Here we  
179 do not elaborate further on the details and value of each individual effort, though more  
180 information regarding these efforts can be found in supplemental materials or by contacting the  
181 authors. For the purposes of this exercise we focus on which *categories* of the systems change  
182 framework each effort falls under to identify broader patterns of need and progress.

183

### 184 **Step 3. Evaluating Areas of Greatest Progress and Greatest Need**

185 We evaluated the areas of greatest progress and need by asking four questions: (1) which  
186 systems change category housed the largest number of concerns, (2) which category housed  
187 the largest number of efforts, (3) in which category did the concerns most “outweigh” the efforts,  
188 and (4) in which category did the efforts most “outweigh” the concerns? We find the largest  
189 number of concerns were within semi-explicit systems, while the majority of efforts were focused  
190 on explicit systems. Therefore, semi-explicit concerns most outweighed the existing efforts in  
191 that category, whereas efforts to tackle explicit systems were more frequent than concerns  
192 expressed about explicit systems. This assessment guided our further analysis of our program  
193 as a system.

194

### 195 **Discussion**

196 We have described a three-step exercise that graduate programs can engage in to evaluate  
197 their equity and inclusion efforts and identify areas of greatest progress and greatest need.

198 When undergoing this exercise for the home program of the authors (the University of Texas at  
199 Austin EEB Graduate Program), we find that student concerns primarily fall into the semi-explicit  
200 category of the systems change framework (Relationships & Connections / Power Dynamics).

201

202 In this EEB program, graduate students in general did not express strong concern regarding  
203 explicit policies--we evaluate this to mean that the program is successfully implementing policies

204 that support a diverse and inclusive climate. Collaboration, infrastructure, variety of expertise,  
205 grant and fellowship success, and publication quality were not frequently questioned. A  
206 “scientific policy” concern worth noting is the infrequency of course offerings: in response to this  
207 concern, the students have conducted a survey to collect data on what specific classes should  
208 be offered more regularly and what classes students have found most valuable.

209

210 The majority of explicit concerns that were expressed fall under “Resource Flows” and refer  
211 primarily to the intangible resources that result from a mentor/mentee relationship, rather than  
212 more traditional resources such as stipend. Even within their labs, graduate students have little  
213 control over resource flows and power dynamics (Sheltzer and Smith, 2014). Project  
214 distribution, hours, and authorship agreements are often informal, and there is little  
215 standardization of appropriate procedures and boundaries. As a result, students are subject to  
216 the supervisor’s decisions and changes in those decisions with little recourse (Mervis, 2016).  
217 The efforts we describe here that fall under the category of Resource Flows include a Bill of  
218 Rights which codifies some basic rights for students, as well as collecting regular data on  
219 resource distribution (e.g. demographics of award recipients) as called for by the 2007 National  
220 Academies report on women in STEM academia (Institute of Medicine, 2007). Formalizing a  
221 mechanism for enforcing student rights, clarifying the arbitration process, and adjusting  
222 resource distribution to meet program equity goals are all sensible and necessary explicit next  
223 steps.

224

225 Within the semi-explicit and implicit systems, nearly all of the concerns expressed in this  
226 exercise regarding relationships and power dynamics were “vertical” rather than “horizontal.”  
227 This indicates promotion of a positive peer-to-peer graduate student environment. But  
228 unfortunately, there is an extensive list of concerns surrounding the culture and infrastructure of  
229 mentorship. Our finding that graduate student concerns focus on dynamics between supervisor  
230 and mentee is unsurprising given that individual graduate experiences are often formed within  
231 the smaller context of the lab (Slay et al., 2019). Further, the academic system at predominantly  
232 white institutions does not inherently cultivate a culture of mentoring due to a focus on individual  
233 performance and independent productivity (Joseph, 2012; Meschitti and Lawton Smith, 2017).  
234 The nuanced role of an effective mentor includes scientific as well as psychosocial support  
235 (Lechuga, 2011). Effective mentorship has been empirically shown to be vital to graduate  
236 student success, particularly for under-represented groups (Riffle et al., 2013; Mack et al., 2013;  
237 San Miguel and Kim, 2015; for review see Makarem and Wang, 2020). The presence of a

238 person the student considers a mentor who provides encouragement can counteract feelings of  
239 isolation experienced by women and under-represented minorities, as well as increase self-  
240 efficacy, job satisfaction, and work engagement (Tenenbaum et al., 2001; Handelsman et al.,  
241 2005; Meschitti and Lawton Smith, 2017). However, fear of appearing prejudiced has led to a  
242 “culture of silence” around the salience of race and ethnicity in mentor/mentee relationships in  
243 biology which prevents mentors from providing constructive psychosocial support for mentees  
244 (Byars-Winston et al., 2019). Our existing efforts to address these mentorship concerns focus  
245 broadly at the departmental level and are aimed at improving the student’s sense of support  
246 from the program, including a first year mentorship plan and personnel management training.  
247 Refocusing reform towards building accountability for quality of mentorship, rewarding effective  
248 mentors, and providing regular opportunities for mentorship skill building would target semi-  
249 explicit and implicit aspects of student concerns more directly and have a mutually beneficial  
250 impact on scientific outcomes (Lechuga, 2011; Varkey et al., 2012). For example, mentorship  
251 evaluation could be explicitly included in promotion and tenure applications and those who fall  
252 short could be asked to complete appropriate training.

253

254 The implicit concerns voiced by students in this exercise frequently and distinctly targeted  
255 women and minorities. Students were sometimes the subject of these incidents and frequently  
256 firsthand witnesses. Graduate programming to prevent or respond decisively to these  
257 interactions (jokes, comments, dismissal, or minimization) should be of the utmost importance.  
258 Our efforts to address implicit systems include a monthly discussion group for issues of equity  
259 and inclusion as well as trainings for students and faculty in bystander intervention and implicit  
260 bias. More regular and required training in restorative justice, anti-racism, personal resilience,  
261 decolonization, and anti-oppression would better match the regularity and pervasiveness  
262 students expressed (Bekki et al., 2013; Jackson et al., 2014).

263

264 However, implicit concerns, such as those regarding mental models such as biases,  
265 discrimination, and stereotype narratives, are highly intangible and societally pervasive.  
266 Paradoxically, the trainees who are most emphatically expressing these concerns are those  
267 most impaired by these mental models (Porter et al., 2018). Given this intangibility and inherent  
268 connection to power dynamics, change in explicit policies and practices is the primary available  
269 route for students to attempt to impact the implicit mental models of those with more seniority  
270 and power. We believe this creates an inherent mismatch within the systems change framework  
271 and hampers rectification on the implicit level. Therefore, faculty leadership in the ongoing work



272 of altering mental models is vital. Policy change without progress in mental models, a core  
273 feature of a systems change framework, is not an effective tool for creating a more inclusive  
274 climate.

275

276 The circulation and presentation of the 2018 departmental climate survey was critical in  
277 changing mental models regarding the pervasiveness and seriousness of graduate student  
278 concerns (see supplemental material). In the survey, students and staff were asked to reflect on  
279 their experiences and evaluate how included they felt in various aspects related to their identity.  
280 Similar surveys have been implemented in other departments (Princeton Graduate Women in  
281 STEM Leadership Council, 2018). Cross-hierarchical communication has the ability to “change  
282 the narrative” and is a crucial step in long-lasting systemic change.

283

## 284 **Conclusions**

285 The academic system is touted as a meritocracy, but in reality, it still embraces norms and  
286 policies that are inequitable and paternalistic, leading to lower productivity and job satisfaction  
287 (Settles et al., 2006). When diverse perspectives are lost from the academic system, the quality,  
288 scholarship, and innovation of the institution is diminished (Østergaard et al., 2011; Díaz-García  
289 et al., 2013; Adams, 2013; Freeman and Huang, 2014; AIShebli et al., 2018). The loss of  
290 competitive colleagues and the dampening of academic aspirations occurs, not for scientific  
291 reasons, but due to a lack of salient support for the types, and disproportionate number, of  
292 barriers experienced by women and under-represented minorities (Handelsman et al., 2005;  
293 Riffle et al., 2013; Ong et al., 2011; Mack et al., 2013). Pushing back on these inequities by  
294 supporting graduate student trainees is vital to generating a more just scientific enterprise.  
295 Improving the experiences of graduate students, particularly marginalized students, is vital to  
296 our collective publication fecundity, effective teaching, competitive recruitment, prolific grant  
297 applications, and high quality research (Adams, 2013; Freeman and Huang, 2014; AIShebli et  
298 al., 2018).

299

300 In many cases there is an initial energy by graduate programs to improve inclusion, often led by  
301 individual students perceptive to these systemic challenges (Porter et al., 2018). But addressing  
302 complex issues that ultimately stem from deep societal iniquities and power structures cannot  
303 be solved in a single hour-long bias training event (Jackson et al., 2014). Efforts must be  
304 multimodal, present at all levels of the systems change framework, and consistent to be  
305 effective.

306

307 Graduate students lack power to generate systemic change not only because of limited financial  
308 resources and institutional power, but also because of the loss in institutional knowledge that  
309 occurs as students graduate, and no mechanism exists for systematically passing knowledge to  
310 new students. As discussed, this is part of why a systems change framework makes the  
311 practice of critical evaluation more effective. However, concerns and efforts initiated by graduate  
312 students must be respected and maintained by more permanent members of a program such as  
313 faculty and staff. Additionally, department wide conversations, events, and trainings should be  
314 held regularly to allow ample opportunity for communications and interactions between levels of  
315 the hierarchy. As we describe here, a critical first step in this process is to evaluate your own  
316 programs' diversity, inclusivity, and climate efforts to determine how well they reflect graduate  
317 student concerns is a critical step in implementing effective change.

318

319 In assessing our efforts, we acknowledge our limitations of our mental models, experiences,  
320 and, at times, reliance on anecdotal data. We hope that our practice spurs more comprehensive  
321 exercises of this nature and research into effective systems change within academia. Future  
322 exercises should include regular re-evaluation across trainee cohorts after policy  
323 implementations, to gauge how the program needs and improvements grow and change over  
324 time. Comparisons between similar programs could stimulate compelling and useful cross-  
325 institutional discussion. Future work should focus increasingly on the intersectionality of  
326 identities, challenges, and experiences within the academic system.

327

328 We hope that the pedagogical exercise constructed here can help programs critically assess  
329 their efforts to improve climate and culture, and we hope this in turn positively impacts diversity  
330 and inclusivity in both direct and indirect ways. Program efforts that thoughtfully and actively  
331 enrich trainee experiences in graduate school promote a healthier and happier scientific  
332 community.

333 **Figure Legends**

334

335 **Figure 1.** Demographic representation statistics for the Ecology, Evolution, and Behavior  
336 Graduate Program and the Department of Integrative Biology at the University of Texas at  
337 Austin. (A) A comparison of PhD graduation rates of under-represented (Black, Hispanic, and  
338 Native America) and non-underrepresented admitted students (white and Asian) in the EEB  
339 Program. (B) Gender demographics of graduate students admitted into the PhD Program from  
340 2014-2017 and (C) gender demographics of applicants to the IB Department's five most recent  
341 faculty searches (randomized for anonymity).

342

343 **Figure 2.** Definitions of the explicit, semi-explicit, and implicit categories of a systems change  
344 framework, adapted for biology academic graduate programs

345

346 **Figure 3.** Graduate Student Concerns in an EEB Graduate Program

347

348 **Figure 4.** Graduate Student Efforts in an EEB Graduate Program

349

350 **Acknowledgements**

351 The authors would like to thank the students who participated the climate survey and  
352 participated in discussions with the authors. We would like to thank Marian Schmidt and Brian  
353 Barnes for manuscript editing, and two anonymous reviewers for comments and support.

354

355 **Data Accessibility Statement**

356 Primary data related to Figure 1 can be obtained by contacting [juliayork@utexas.edu](mailto:juliayork@utexas.edu).

357

358 **Competing Interests Statement**

359 The authors declare no competing interests.

360

361 **Author Contributions**

362 KW conceived of the report. JY collected quantitative data. KW and JY wrote the manuscript. All  
363 authors give final approval for publication.

364

365

366 **References**

- 367 Adams, J. (2013). The fourth age of research. *Nature*. 497: 557-560.
- 368
- 369 Allen-Ramdial SA & Campbell AG (2014). *Reimagining the Pipeline: Advancing STEM Diversity,*  
370 *Persistence, and Success*. *BioScience*, 64:7, 612-618.
- 371
- 372 AlShebli, B.K., Rahwan, T., and Woon, W.L. (2018). Ethnic diversity increases scientific impact.  
373 arXiv preprint. Available at: <https://arxiv.org/pdf/1803.02282.pdf>
- 374
- 375 Barnes, M.E., Truong, J.M., Grunspan, D.Z., and Brownell, S.E. (2020). Are scientists biased  
376 against Christians? Exploring real and perceived bias against Christians in academic biology.  
377 *PLoS ONE*. 15 (1): e0226826.
- 378
- 379 Bekki, J.M., Smith, M.L., Bernstein, B.L., and Harrison, C. (2013). Effects of an online personal  
380 resilience training program for women in STEM doctoral programs. *Journal of Women and*  
381 *Minorities in Science and Engineering*. 19 (1): 17-35.
- 382
- 383 Brown, N. and Leigh, J. (2018). Ableism in academia: where are all the disabled and ill  
384 academics? *Disability & Society*. 33 (6): 985-989.
- 385
- 386 Byars-Winston, A., Leverett, P., Benbow, R.J., Pfund, C., Thayer-Hart, N., and Branchaw, J.  
387 (2019). Race and ethnicity in biology research mentoring relationships. *Journal of Diversity in*  
388 *Higher Education*. DOI: 10.1037/dhe0000106
- 389
- 390 Case, S.S. and Richley, B.A. (2013). Gendered institutional research cultures in science: the  
391 post-doc transition for women scientists. *Community, Work & Family*. 16 (3): 327-349.
- 392
- 393 Coffman, J. (2007). *A framework for evaluating systems initiatives*. Washington, DC: Build  
394 Initiative.
- 395
- 396 Díaz-García, C., González-Moreno, A., and Sáez-Martínez, F.J. (2013). Gender diversity within  
397 R&D teams: its impact on radicalness of innovation. *Innovation: Management, Policy & Practice*.  
398 15 (2): 149-160.
- 399

400 Foster-Fishman, P. and Watson, E. (2018). Creating habits for inclusive change. *Inclusive*  
401 *Community Change*. 10 (4): 51-71  
402  
403 Freeman, R.B. and Huang, W. (2014). Strength in diversity. *Nature*. 513: 305.  
404  
405 Glass, J.L., Sessler, S., Levitte, Y., and Michelmore, K.M. (2013). What's so special about  
406 STEM? A comparison of women's retention in STEM and professional occupations. *Social*  
407 *Forces*. 92 (2): 723-756.  
408  
409 Gold, J.A., Jia, L., Bentzley, J.P., Bonnet, K.A., Franciscus, A.M., Denduluri, M.S., and Zappert,  
410 L.T. (2020). WISE: a support group for graduate and post-graduate women in STEM.  
411 *International Journal of Group Psychotherapy*. DOI: 10.1080/00207284.2020.1722674  
412  
413 Handelsman, J., Cantor, N., Carnes, M., Denton, D., Fine, E., Grosz, B., Hinshaw, V., Marrett,  
414 C., Rosser, S., Shalala, D., and Sheridan, J. (2005). More women in science. *Science*. 309:  
415 1190-1191.  
416  
417 Hirshfield, L.E. (2014). 'She's not good with crying': the effect of gender expectation on graduate  
418 students' assessments of their principal investigators. *Gender and Education*. 26 (6); 601-617.  
419  
420 Institute of Medicine. (2007). *Beyond bias and barriers: fulfilling the potential of women in*  
421 *academic science and engineering*. Washington, DC: The National Academies Press.  
422 <https://doi.org/10.17226/11741>  
423  
424 Kania J., Kramer M., and Senge, P. (2018). *The water of systems change*. Boston: FSG.  
425  
426 Jackson, S.M., Hillard, A.L., and Schneider, T.R. (2014). Using implicit bias training to improve  
427 attitudes toward women in STEM. *Social Psychology Education*. 17: 419-438.  
428  
429 Jenal, M. and Cunningham, S. (2020). Systemic change: evolving conditions that hold a  
430 situation in place. *Mesopartner*. Accessed from:  
431 [https://www.mesopartner.com/fileadmin/media\\_center/Other\\_Publications/Systemic\\_change.pdf](https://www.mesopartner.com/fileadmin/media_center/Other_Publications/Systemic_change.pdf)  
432

- 433 Joseph, J. (2012). From one culture to another: years one and two of graduate school for  
434 African American women in the STEM fields. *International Journal of Doctoral Studies*. 7: 125-  
435 142.
- 436
- 437 Lechuga, V.M. (2011). Faculty-graduate student mentoring relationships: mentors' perceived  
438 roles and responsibilities. *Higher Education*. 62: 757-771.
- 439
- 440 Li, D. and Koedel, C. (2017). Representation and salary gaps by race-ethnicity and gender at  
441 selective public universities. *Educational Researcher*. 46 (7): 343-354.
- 442
- 443 Mack, K., Rankins, C., and Woodson, K. (2013). From graduate school to the STEM workforce:  
444 an entropic approach to career identity development for STEM women of color. *New Directions*  
445 *for Higher Education*. 163: 23-34.
- 446
- 447 Makarem, Y. and Wang, J. (2020). Career experiences of women in science, technology,  
448 engineering, and mathematics fields: a systematic literature review. *Human Resource*  
449 *Development Quarterly*. 31: 91-111.
- 450
- 451 Martinez, E.D., Botos, J., Dohoney, K.M., et al (2007) *Falling off the academic bandwagon*.  
452 *EMBO Reports*, 8:11, 977-981. doi:10.1038/sj.embor.7401110
- 453
- 454 Meschitti, V. and Lawton Smith, H. (2017). Does mentoring make a difference for women  
455 academics? Evidence from the literature and a guide for future research. *Journal of Research in*  
456 *Gender Studies*. 7 (1): 166-199.
- 457
- 458 Mervis, J. (2016). Mentoring's moment. *Science*. 353 (6303): 980-982.
- 459
- 460 National Science Foundation, National Center for Science and Engineering Statistics. (2017).  
461 *Women, Minorities, and Persons with Disabilities in Science and Engineering: 2017*. Special  
462 Report NSF **17-310**. Arlington, VA. Available at [www.nsf.gov/statistics/wmpd/](http://www.nsf.gov/statistics/wmpd/)
- 463
- 464 National Science Foundation, National Center for Science and Engineering Statistics. (2019).  
465 *Women, Minorities, and Persons with Disabilities in Science and Engineering: 2019*. Special  
466 Report NSF **19-304**. Alexandria, VA. Available at <https://www.nsf.gov/statistics/wmpd/>

467  
468 Ong, M., Wright, C., Espinosa, L.L., and Orfield, G. (2011). Inside the double bind: a synthesis  
469 of empirical research on undergraduate and graduate women of color in science, technology,  
470 engineering, and mathematics. *Harvard Educational Review*. 81 (2): 172-390.  
471  
472 Østergaard, C.R., Timmermans, B., and Kristinsson, K. (2011). Does a different view create  
473 something new? The effect of employee diversity on innovation. *Research Policy*. 40: 500-509.  
474  
475 Patridge, E.V., Barthelemy, R.S., and Rankin, S.R. (2014). Factors impacting the academic  
476 climate for LGBTQ STEM faculty. *Journal of Women and Minorities in Science and Engineering*.  
477 20 (1): 75-98.  
478  
479 Porter, K.B., Posselt, J.R., Reyes, K., Slay, K.E., and Kamimura, A. (2018). Burdens and  
480 benefits of diversity work: emotion management in STEM doctoral students. *Studies in*  
481 *Graduate and Postdoctoral Education*. 9 (2): 127-143.  
482  
483 Princeton Graduate Women in STEM Leadership Council. (2018). Climate report on gender  
484 issues for graduate students at Princeton University. Available at:  
485 [https://wstem.princeton.edu/wp-content/uploads/sites/473/2019/02/2018-Climate-Report-on-](https://wstem.princeton.edu/wp-content/uploads/sites/473/2019/02/2018-Climate-Report-on-Gender-Issues-for-Graduate-Students-at-Princeton-University-1.pdf)  
486 [Gender-Issues-for-Graduate-Students-at-Princeton-University-1.pdf](https://wstem.princeton.edu/wp-content/uploads/sites/473/2019/02/2018-Climate-Report-on-Gender-Issues-for-Graduate-Students-at-Princeton-University-1.pdf)  
487  
488 Reardon, S. (2017). Republican scientists negotiate the Trump era. *Nature*. 544: 280-281.  
489  
490 Riffle, R., Schneider, T., Hillard, A., Polander, E., Jackson, S., DesAutels, P., and Wheatly, M.  
491 (2013). A mixed methods study of gender, STEM department climate, and workplace outcomes.  
492 *Journal of Women and Minorities in Science and Engineering*. 19 (3): 227-243.  
493  
494 San Miguel, A.M. and Kim, M.M. (2015). Successful Latina scientists and engineers: their lived  
495 mentoring experiences and career development. *Journal of Career Development*. 42 (2): 133-  
496 148.  
497  
498 Settles, I.H., Cortina, L.M., Malley, J., and Stewart, A.J. (2006). The climate for women in  
499 academic science: the good, the bad, and the changeable. *Psychology of Women Quarterly*. 30:  
500 47-58.



501  
502 Shaw, A.K. and Stanton, D.E. (2012). Leaks in the pipeline: separating demographic inertia from  
503 ongoing gender differences in academia. *Proceedings of the Royal Society B*. 279: 3736-3741.  
504  
505 Sheltzer, J.M. and Smith, J.C. (2014). Elite male faculty in the life sciences employ fewer  
506 women. *Proceedings of the National Academy of Sciences*. 111 (28): 10107-10112.  
507  
508 Slay, K.E., Reyes, K.A., and Posselt, J.R. (2019). Bait and switch: representation, climate, and  
509 tensions of diversity work in graduate education. *The Review of Higher Education*. 42: 255-286.  
510  
511 Su, X., Johnson, J., and Bozeman, B. (2015). Gender diversity strategy in academic  
512 departments: exploring organizational determinants. *Higher Education*. 69: 839-858.  
513  
514 Tao, K.W. and Gloria, A.M. (2019). Should I stay or should I go? The role of impostorism in  
515 STEM persistence. *Psychology of Women Quarterly*. 43 (2): 151-164.  
516  
517 Tenenbaum, H.R., Crosby, F.J., and Gliner, M.D. (2011). Mentoring relationships in graduate  
518 school. *Journal of Vocational Behavior*. 59: 326-341.  
519  
520 Turk-Bicakci, L., Berger, A., and Haxton, C. (2014). The nonacademic careers of STEM PhD  
521 holders. *Broadening Participation in STEM Graduate Education*. American Institutes for  
522 Research. Available at:  
523 [https://www.air.org/sites/default/files/downloads/report/STEM%20nonacademic%20careers%20](https://www.air.org/sites/default/files/downloads/report/STEM%20nonacademic%20careers%20April14.pdf)  
524 [April14.pdf](https://www.air.org/sites/default/files/downloads/report/STEM%20nonacademic%20careers%20April14.pdf)  
525  
526 van Anders, S.M. (2004). Why the academic pipeline leaks: fewer men than women perceive  
527 barriers to becoming professors. *Sex Roles*. 51 (9/10): 511-521.  
528  
529 Van Cooten, S. (2014). Where are the indigenous scientific leaders? *American Meteorological*  
530 *Society*. DOI:10.1175/BAMS-D-13-00097.1  
531  
532 Varkey, P., Jatoi, A., Williams, A., Mayer, A., Ko, M., Files, J., Blair, J., and Hayes, S. (2012).  
533 The positive impact of a facilitated peer mentoring program on academic skills of women faculty.  
534 *BMC Medical Education*. 12: 14.

535

536 Williams, J.C., Korn, R. (2018). Climate report on gender issues for graduate students at  
537 Princeton University. The Princeton Graduate Women in STEM Leadership Council.

538

539 Yoder, J.B. and Mattheis, A. (2015). Queer in STEM: workplace experiences reported in a  
540 national survey of LGBTQA individuals in science, technology, engineering, and mathematics  
541 careers. *Journal of Homosexuality*. 63 (1): 1-27.

**A**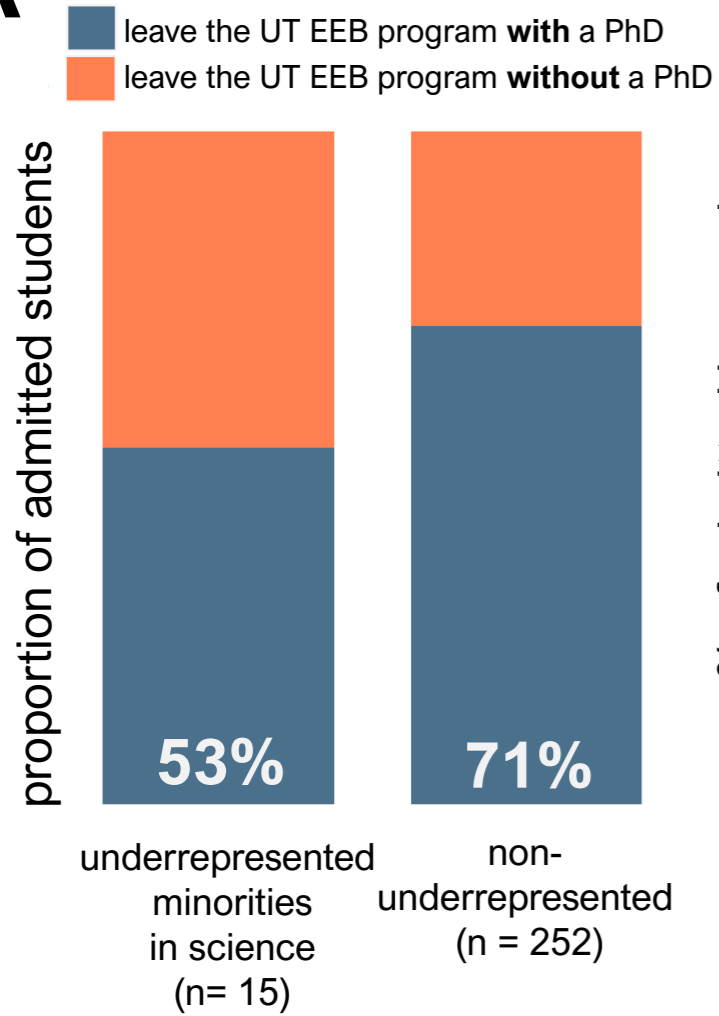**B**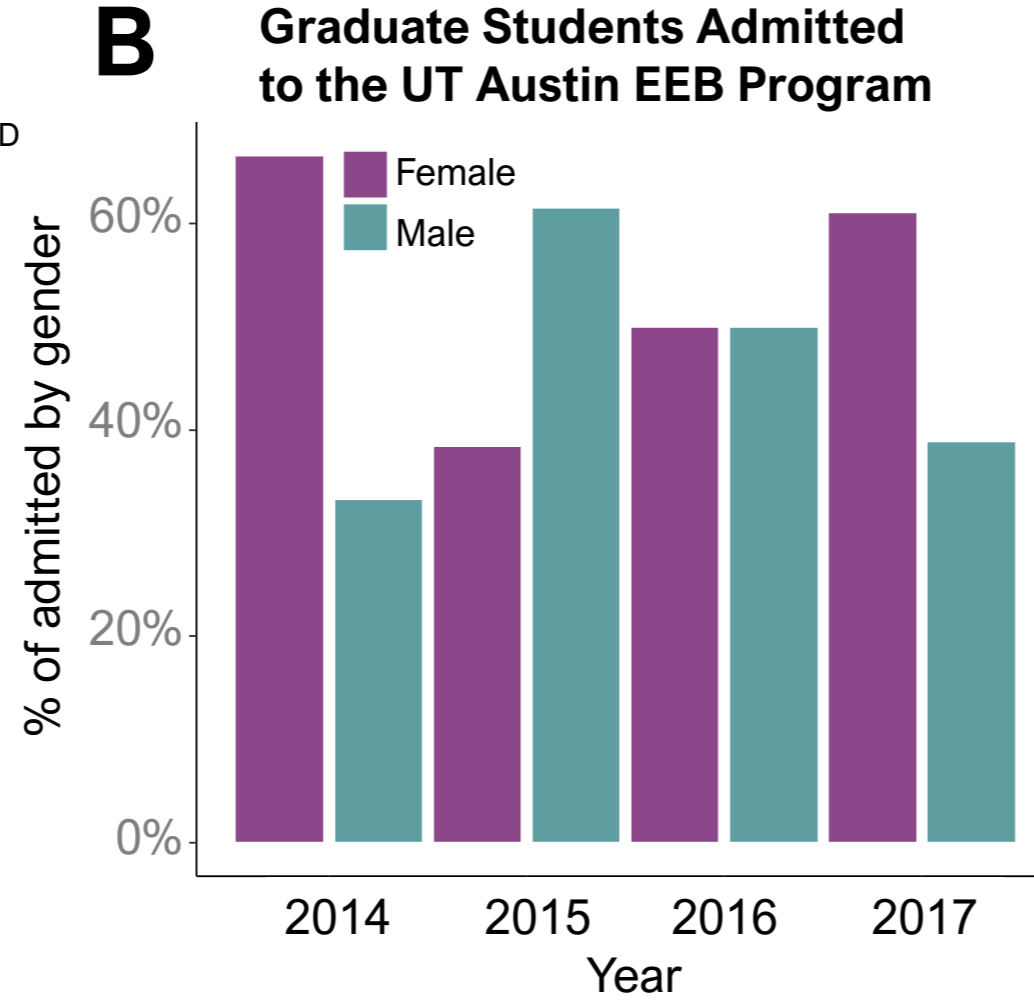**C**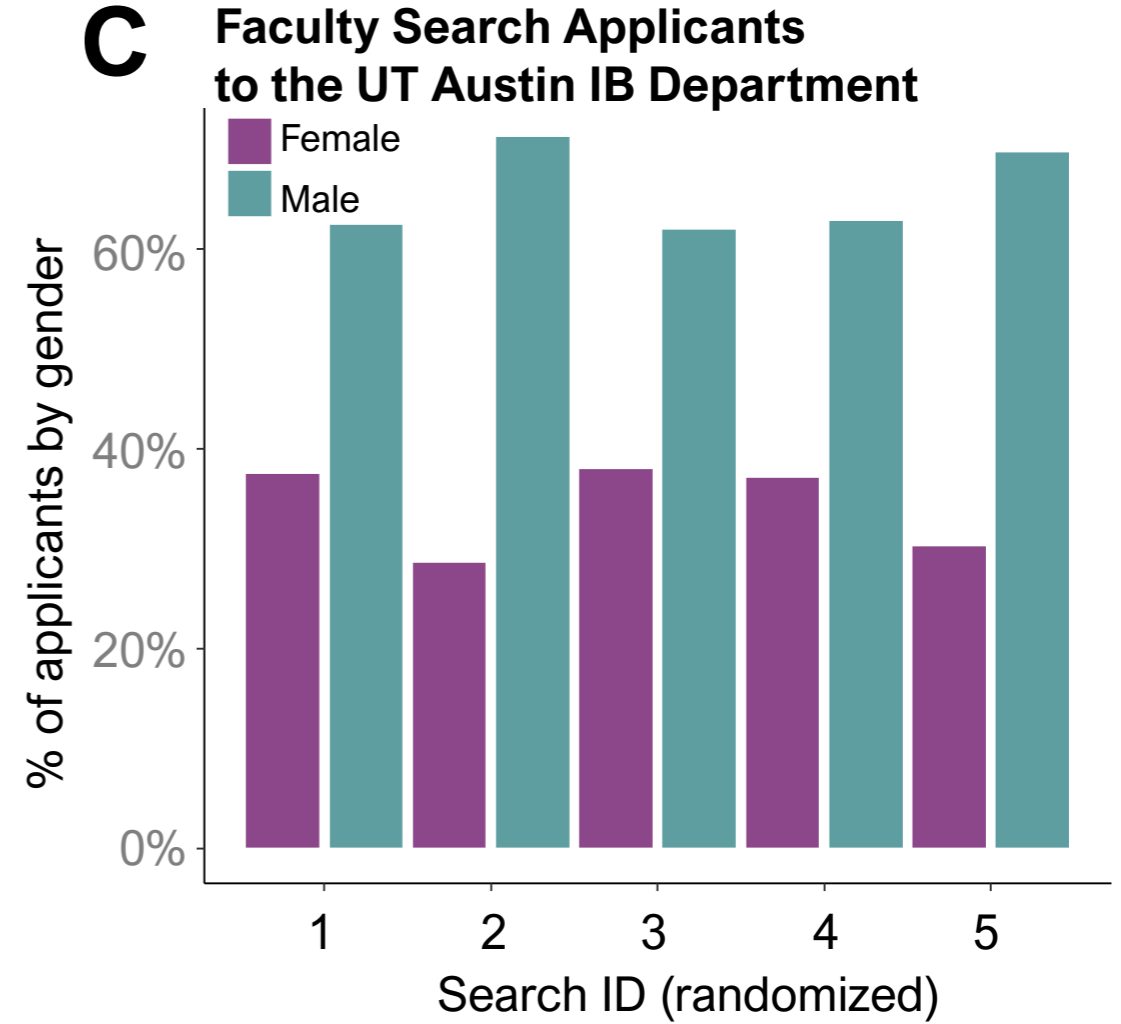

## ***Definitions of the Explicit, Semi-Explicit, and Implicit Categories of a Systems Change Framework***

---

### **Explicit Systems**

***Policies*** Program rules and regulations

***Practices*** Activities, guidelines, and informal habits that entities in the program engage in

***Resource Flows*** The process for allocating and distributing money, people, information, and other infrastructure

### **Semi-Explicit Systems**

***Relationships & Connections*** The quality of connections and communication of entities across hierarchies in the program

***Power Dynamics*** The distribution of decision-making and authority (both formal and informal)

### **Implicit Systems**

***Mental Models*** Habits of thought, biases, beliefs, assumptions, and narratives of entities in the program

## *Graduate Student Concerns in an EEB Graduate Program*

### **Explicit Systems (11)**

#### **Policies (3)**

- No clear student rights and responsibilities
- No code of conduct (including one translatable to field research scenarios)
- No exit surveys

#### **Practices (3)**

- Recommending, promoting, or retaining lab members after complaints have been levied against them
- Refusal to internally address conflict (i.e. relying solely on Ombudsman's Office, FOIA, Title IX)
- Minimization of trainee concerns

#### **Resource Flows (5)**

- "Playing favorites"
- Agreeing to arrangements (e.g. authorship, projects, hours) but subsequently maintaining expectations counter to the agreement
- Absent mentorship
- Lack of support for certain career trajectories
- Frequency of graduate courses

### **Semi-Explicit Systems (13)**

#### **Relationships & Connections (6)**

- "Playing favorites"
- Yelling
- Sexual contact/misconduct/harassment
- Publicly expressed lack of interest in a trainee's work
- Defensive/dismissive/avoidant behavior in relation to discussions on diversity and inclusion
- Absent mentorship

#### **Power Dynamics (7)**

- Harassment
- Lack of explicit anti-racist language/no land acknowledgements
- Bullying/manipulation
- Payment of trainees for tasks outside of their student responsibilities
- Forcing uncomfortable political discussions
- Ignoring trainees' requests
- Loss in institutional knowledge due to student turnover

### **Implicit Systems (5)**

#### **Mental Models (5)**

- Mentors treating or responding to trainees differently based on identity factors
- Encouraging recruits to not enroll in the program
- Minimization of trainee concerns
- Sexist/racist/homophobic comments or jokes
- Making assumptions on a trainee's lack of interest in science or fundamental personality traits when a trainee mentions concerns

## **Graduate Student Efforts in an EEB Graduate Program**

### **Explicit Systems (12)**

#### **Policies (5)**

Graduate Student Bill of Rights  
Departmental Code of Conduct (planned)  
First Year Mentoring Plan and follow-up with the mentor  
Gender neutral restrooms  
Quiet and Lactation rooms

#### **Practices (4)**

Organizing alternative events during Graduate Student Recruitment Weekend  
Annual climate survey  
Exit survey for graduate students (planned)  
Graduate course offering survey

#### **Resource Flows (3)**

Weekly Student Writing Group  
Systematic, regular collection of demographic data regarding student and faculty resource distribution  
Graduate Student Bill of Rights

### **Semi-Explicit Systems (7)**

#### **Relationships & Connections (4)**

Annual climate survey  
Woman trainee luncheon (planned)  
First Year Mentoring Plan  
Monthly Equity and Inclusion Discussion Group

#### **Power Dynamics (3)**

Reestablishing the EEB Graduate Advisor position (establish an official secondary advisor,  
standardize the procedure in which the advisor is chosen to incorporate more student input)  
Departmental Code of Conduct (planned)  
Graduate Student Bill of Rights

### **Implicit Systems (5)**

#### **Mental Models (5)**

Monthly Equity and Inclusion Discussion Group  
Press coverage of Title IX issues  
Bystander training for students and faculty  
Personnel management training for students and faculty  
Collection and analysis of demographic data regarding student and faculty recruitment and retention
